# Supplementary material for: エドガー・アラン・ポウ「群集の人」における語り手と群集の関係 : 当惑、恐怖、そして嫌悪
Source: Royal Society of Chemistry journal article supplement (doi:10.1039/b703656f), 2005-01-01
Supplement: b703656f.pdf [file b703656f.pdf]

## Supplementary information

Coordination features of bis(*N*-Heterocyclic carbenes) and bis(oxazolines) with 1,3-alkylidene-2,4,6-trimethylbenzene spacers. Synthesis of the ligands and Silver and Palladium complexes.

Ermitas Alcalde<sup>a\*</sup>, Rosa M<sup>a</sup> Ceder<sup>b</sup>, Cristina López<sup>b</sup>, Neus Mesquida<sup>a</sup>, Guillermo Muller<sup>b\*</sup>, and Sandra Rodríguez<sup>a</sup>

<sup>a</sup>*Laboratori de Química Orgànica, Facultat de Farmàcia, Universitat de Barcelona, Avda. Joan XXIII s/n, E-08028 Barcelona, Spain.*

<sup>b</sup>*Departament de Química Inorgànica, Universitat de Barcelona, Martí i Franquès 1-11, E-08028 Barcelona, Spain.*

Fig S1. Mass spectrum of **17**

Fig S2. Mass spectrum of **17**, pattern of [PdClBiscarbene]<sup>+</sup>

Fig S3. <sup>13</sup>C{<sup>1</sup>H} spectrum of **17** in CDCl<sub>3</sub>

Fig S4. Expansion of <sup>13</sup>C{<sup>1</sup>H} spectrum of **17** in CDCl<sub>3</sub>

Fig S5. Mass spectrum of **18**

Fig S6. Mass spectrum of **19a**

Fig S7. Mass spectrum of **19a**. Detail of [M-Cl]<sup>+</sup>

Fig S8. Mass spectrum of **19a**. Calculated [M-Cl]<sup>+</sup>

Fig S9. Proton NMR spectrum of **19a** in CDCl<sub>3</sub> (400 MHz)

Fig S10. <sup>13</sup>C{<sup>1</sup>H} spectrum of **19a** in CDCl<sub>3</sub>

Fig S11. Proton NMR spectrum of **19b** in CDCl<sub>3</sub> (400 MHz)

Fig S12. <sup>13</sup>C{<sup>1</sup>H} spectrum of **19b** in CDCl<sub>3</sub>

Fig S13. Mass spectrum of **20b**

Fig S14. Mass spectrum of **20b**. Detail of [M+H]<sup>2+</sup>

Fig S15. Mass spectrum of **20b**. Pattern of [M+H]<sup>2+</sup>

Fig S16. Full assignation of the Proton spectrum of **19a**

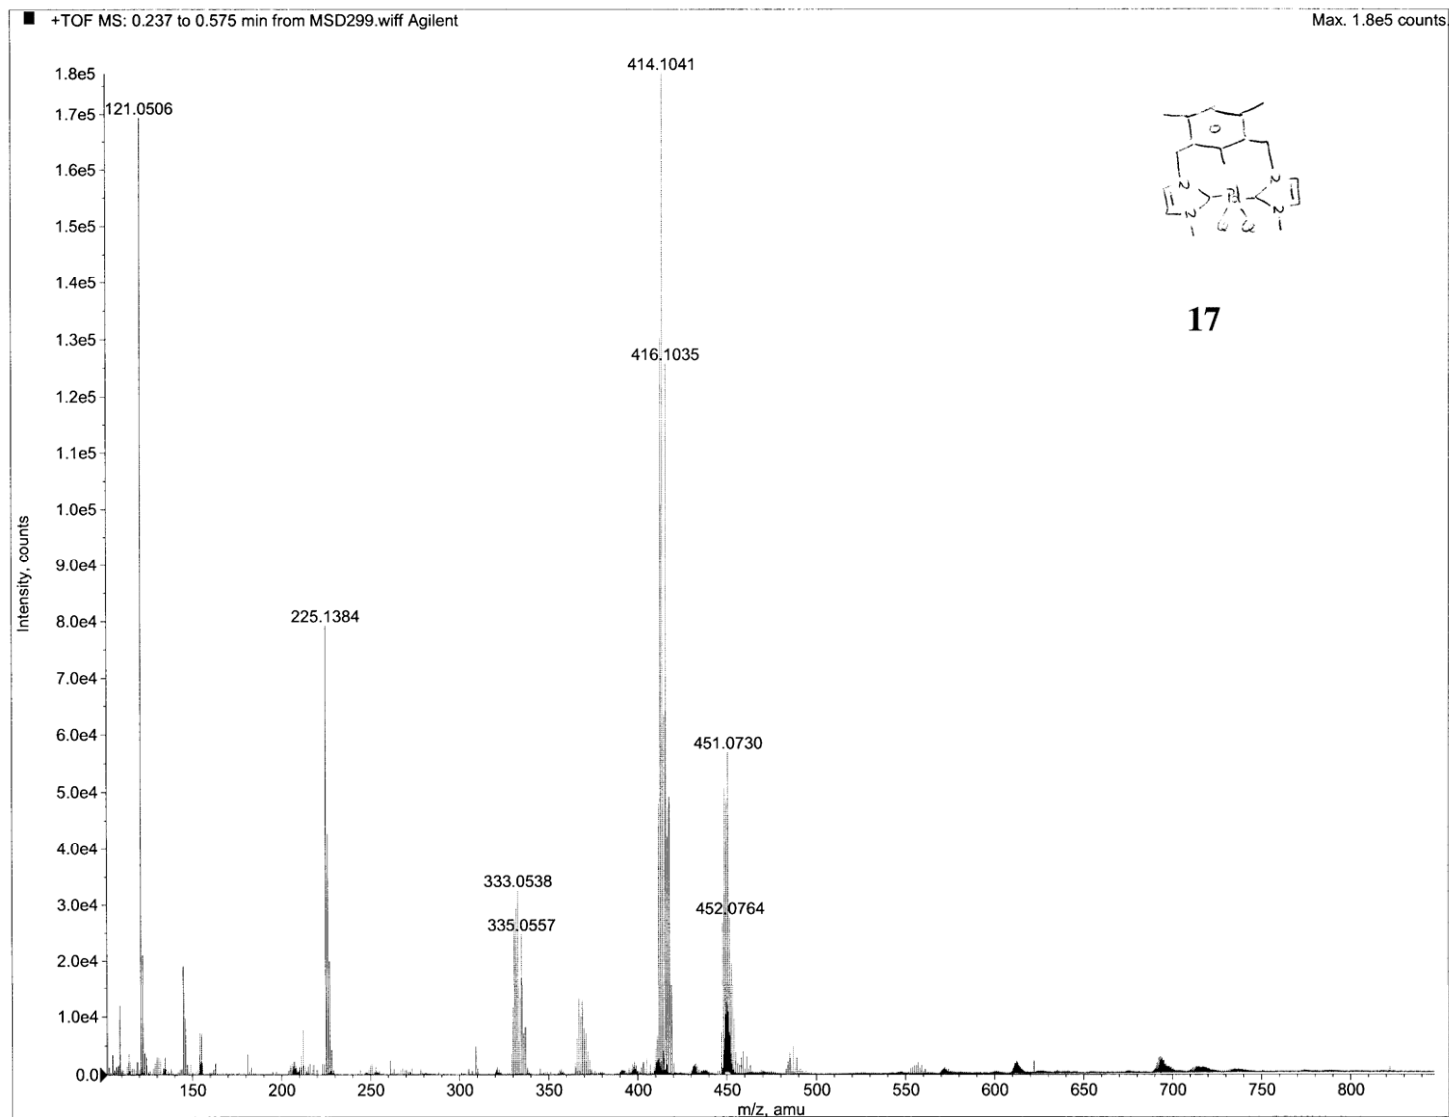

Fig S1. Mass spectrum of **17**

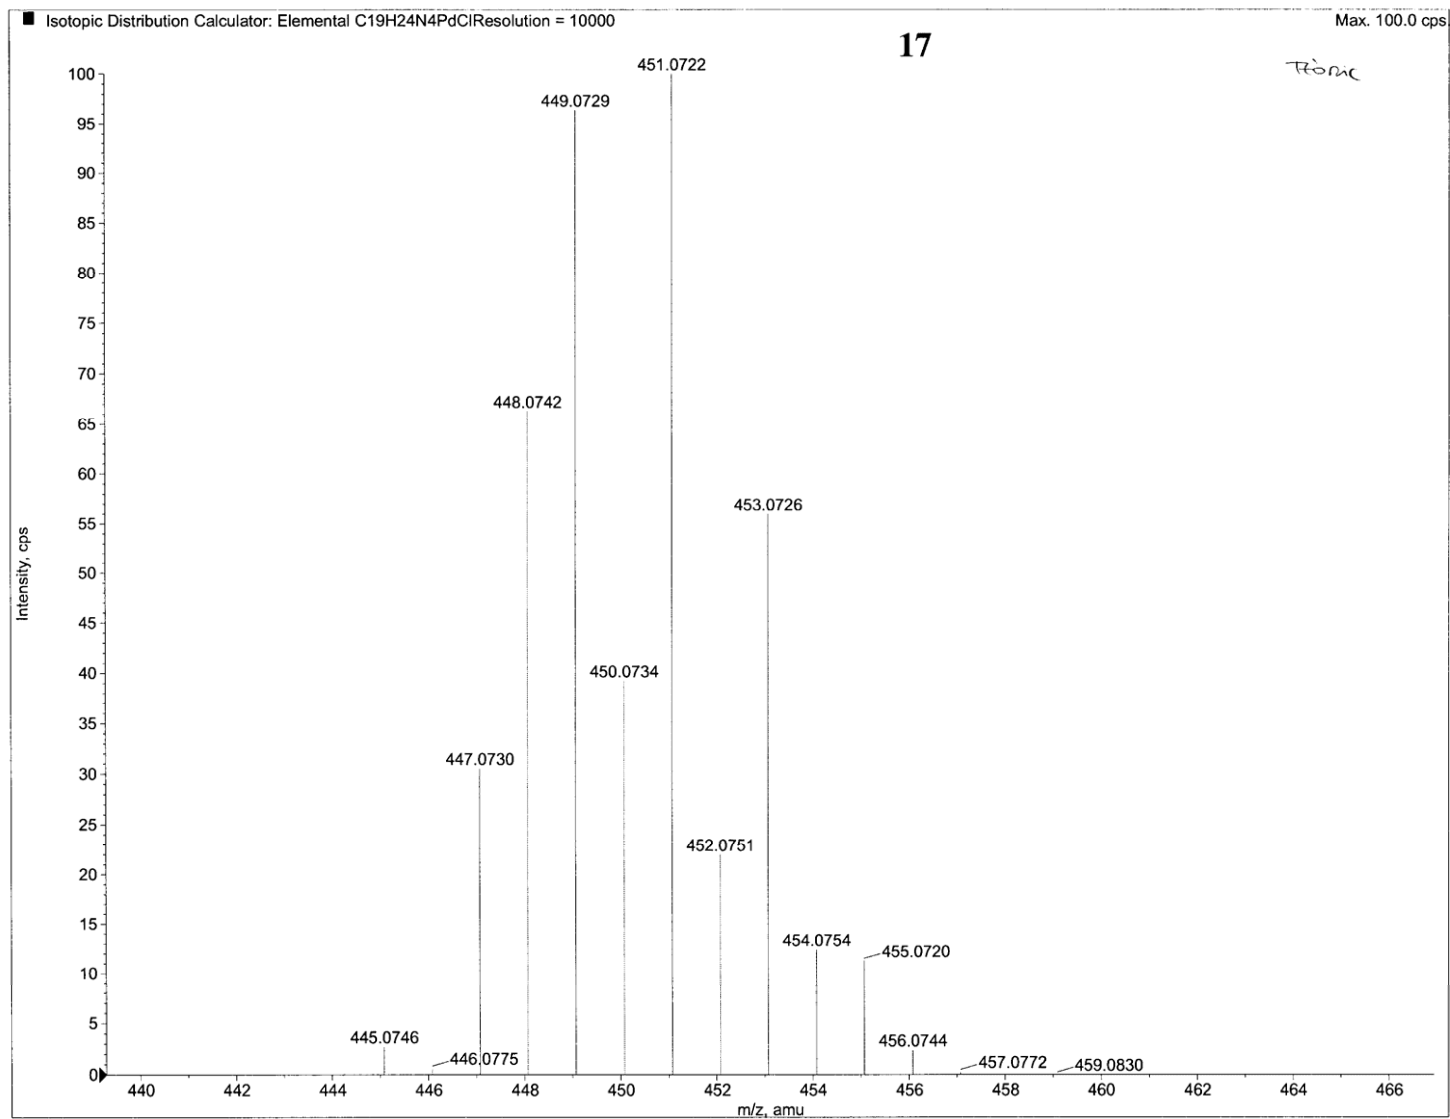

Fig S2. Mass spectrum of **17**, pattern of [PdClBiscarbene]<sup>+</sup>

C13 / s2pu1 / Mercury-400\_qui  
cdc13/Temp: 25C / N reg: M40007-100107180321  
Usuari: q12 / Mostra: c1m196  
Nom: CRISTINA LOPEZ MOSQUERA  
Data:11/01/07 / Sist automatic

Pulse Sequence: s2pu1

17

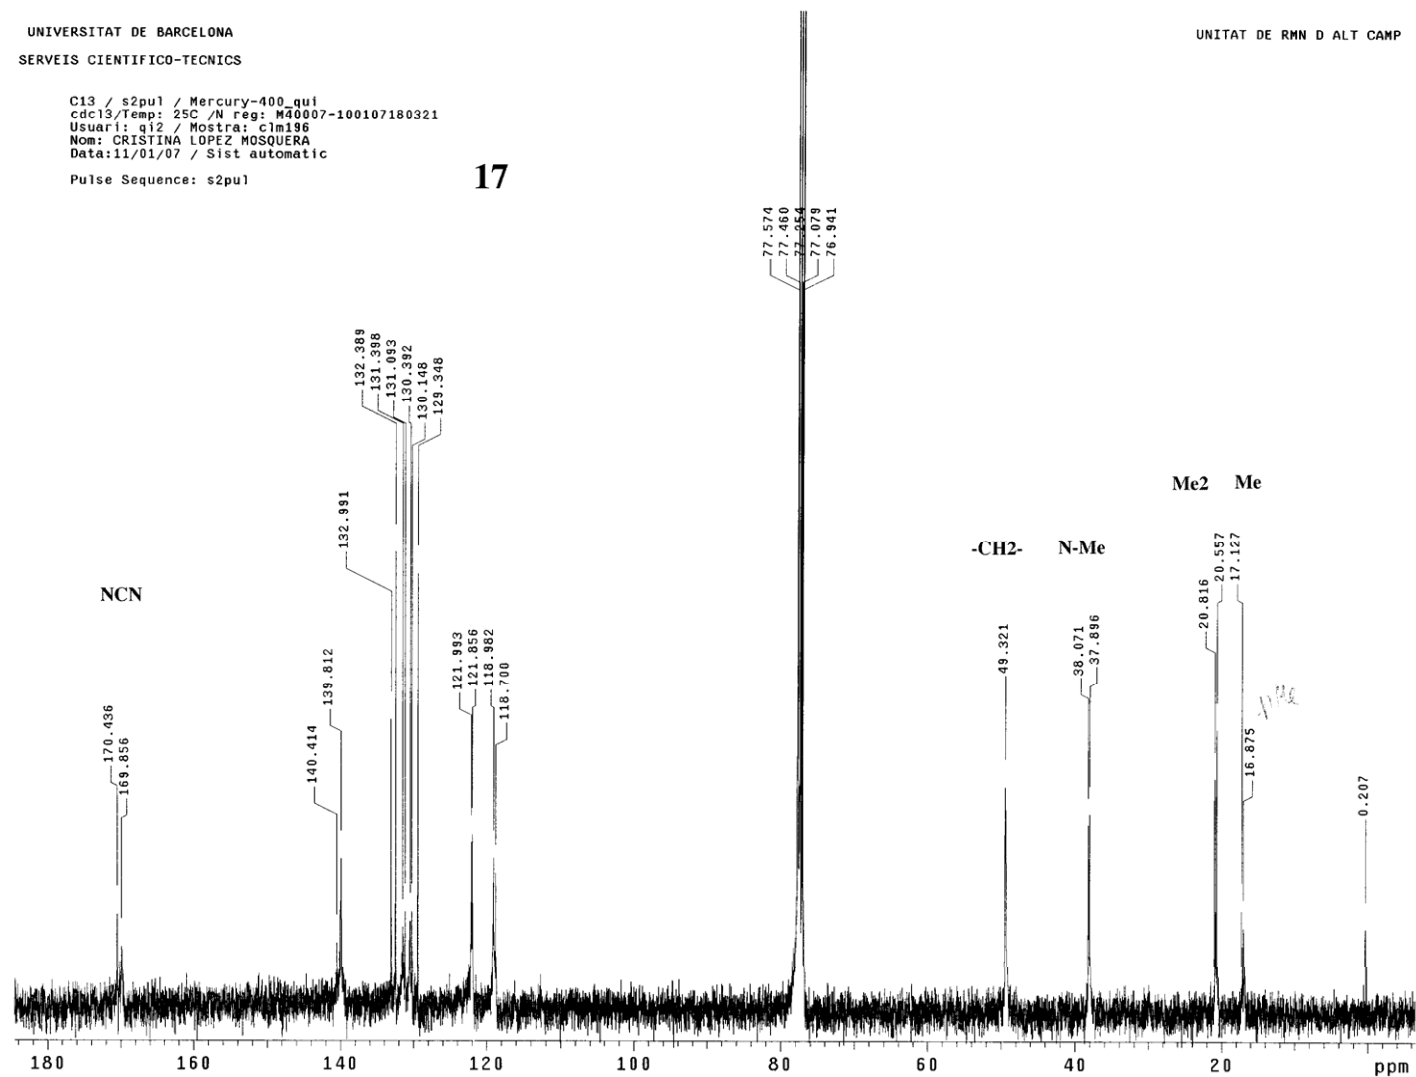

Fig S3.  $^{13}\text{C}\{^1\text{H}\}$  spectrum of 17 in  $\text{CDCl}_3$

C13 / s2pu1 / Mercury-400\_qui  
cdcl3/Temp: 25C /N reg: M40007-100107180321  
Usuari: q12 / Mostra: c1m196  
Nom: CRISTINA LOPEZ MOSQUERA  
Data:11/01/07 / Sist automatic

Pulse Sequence: s2pu1

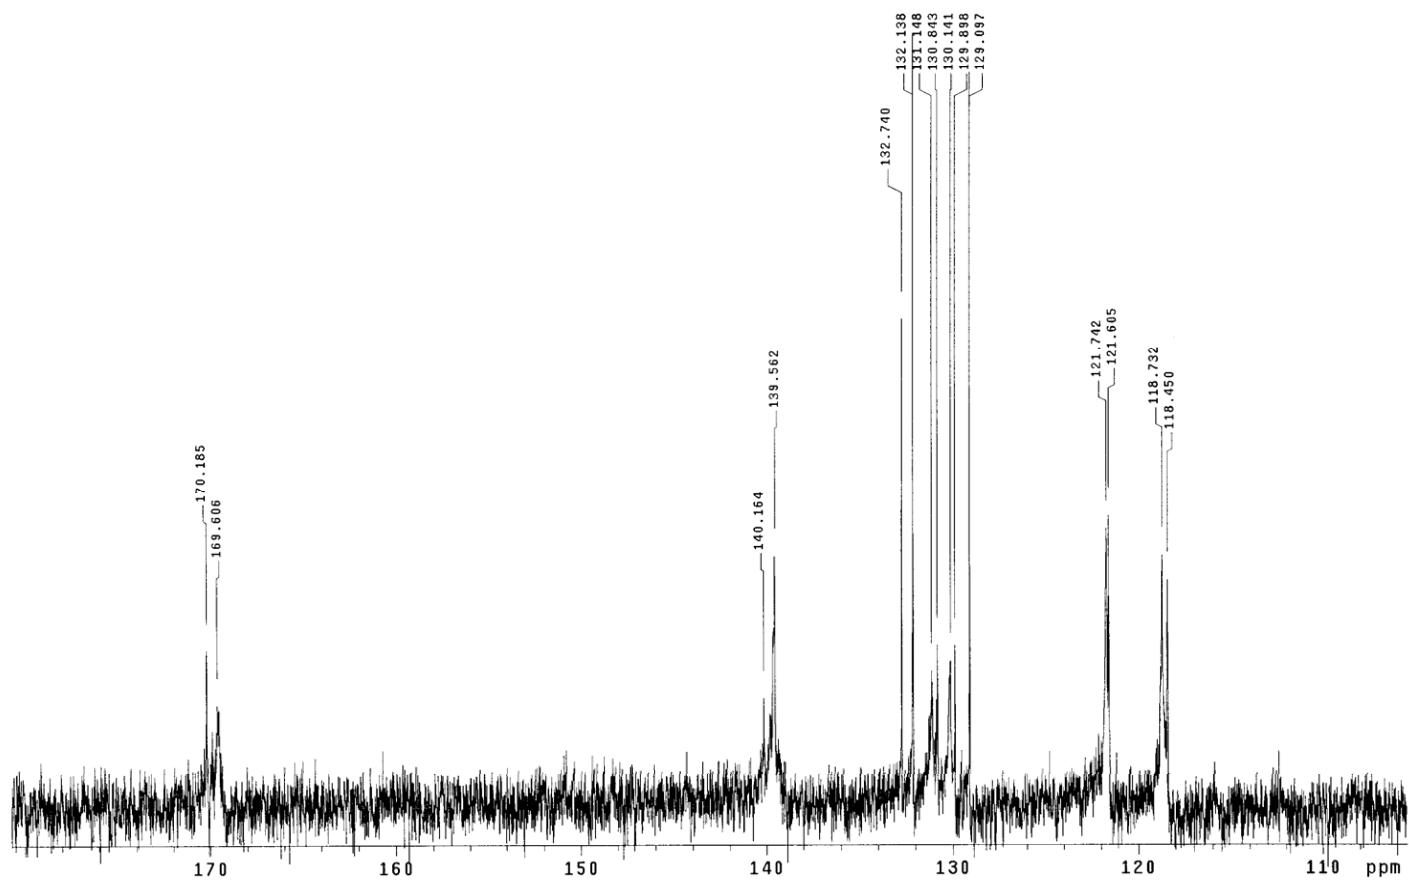

Fig S4. Expansion of  $^{13}\text{C}\{^1\text{H}\}$  spectrum of **17** in  $\text{CDCl}_3$

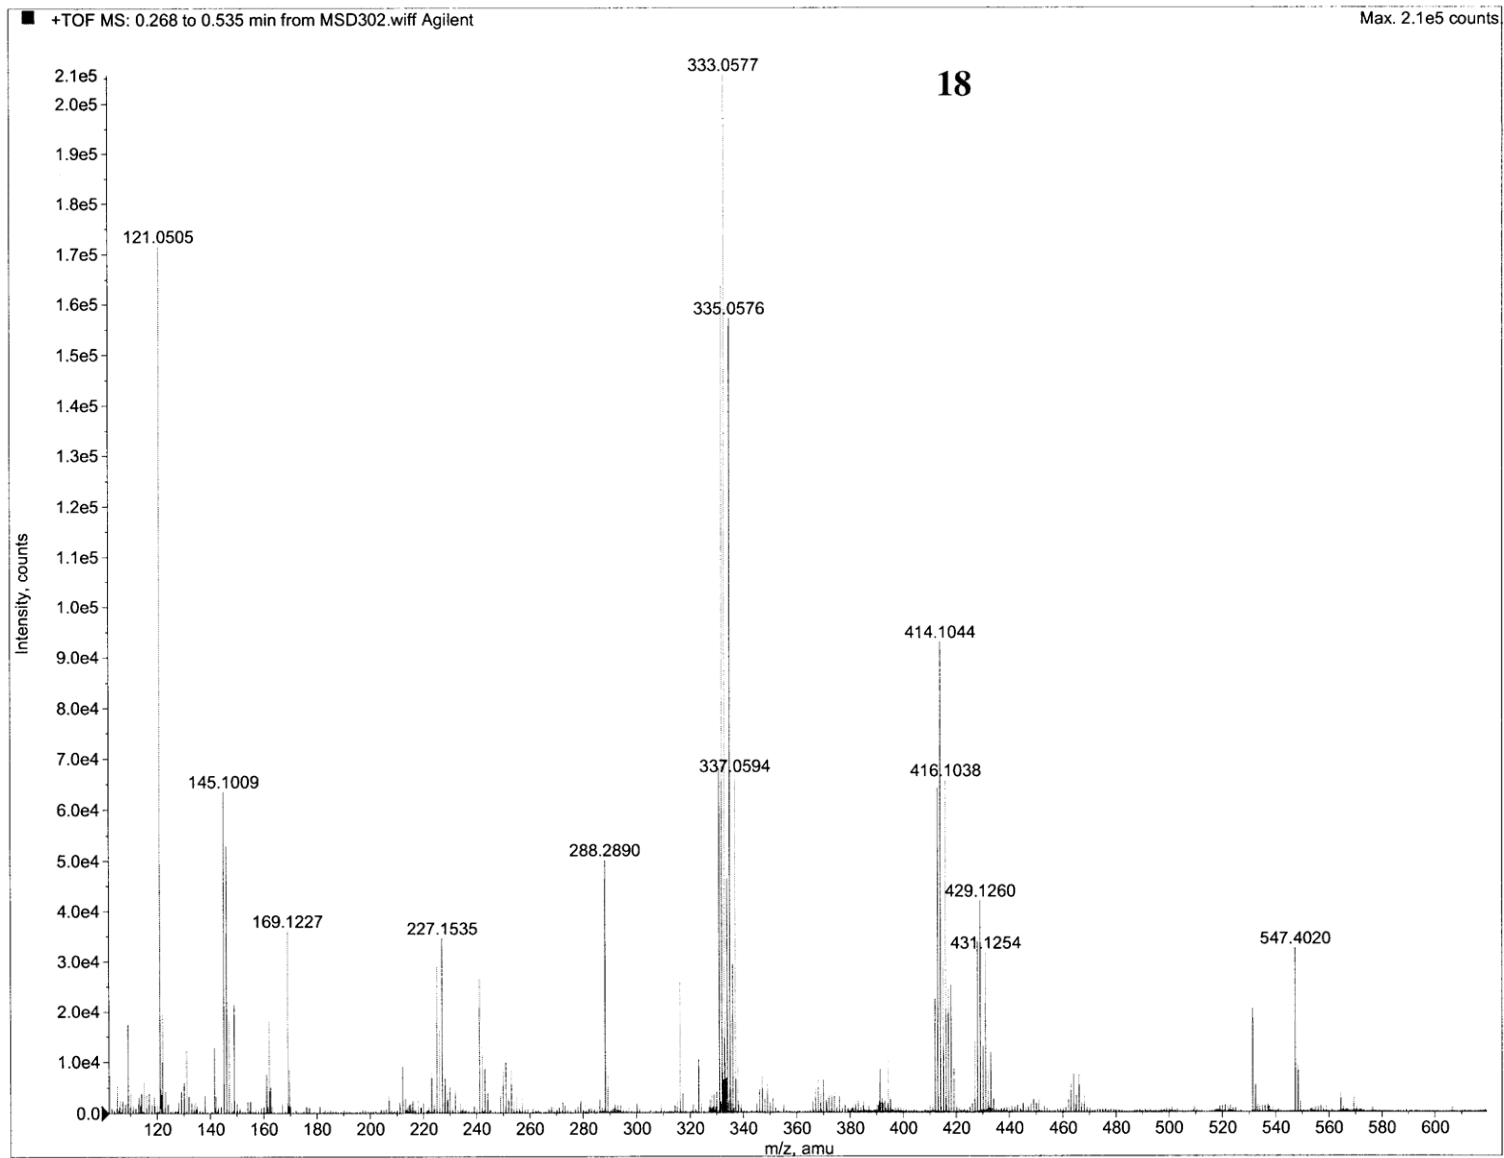

Fig S5. Mass spectrum of **18**

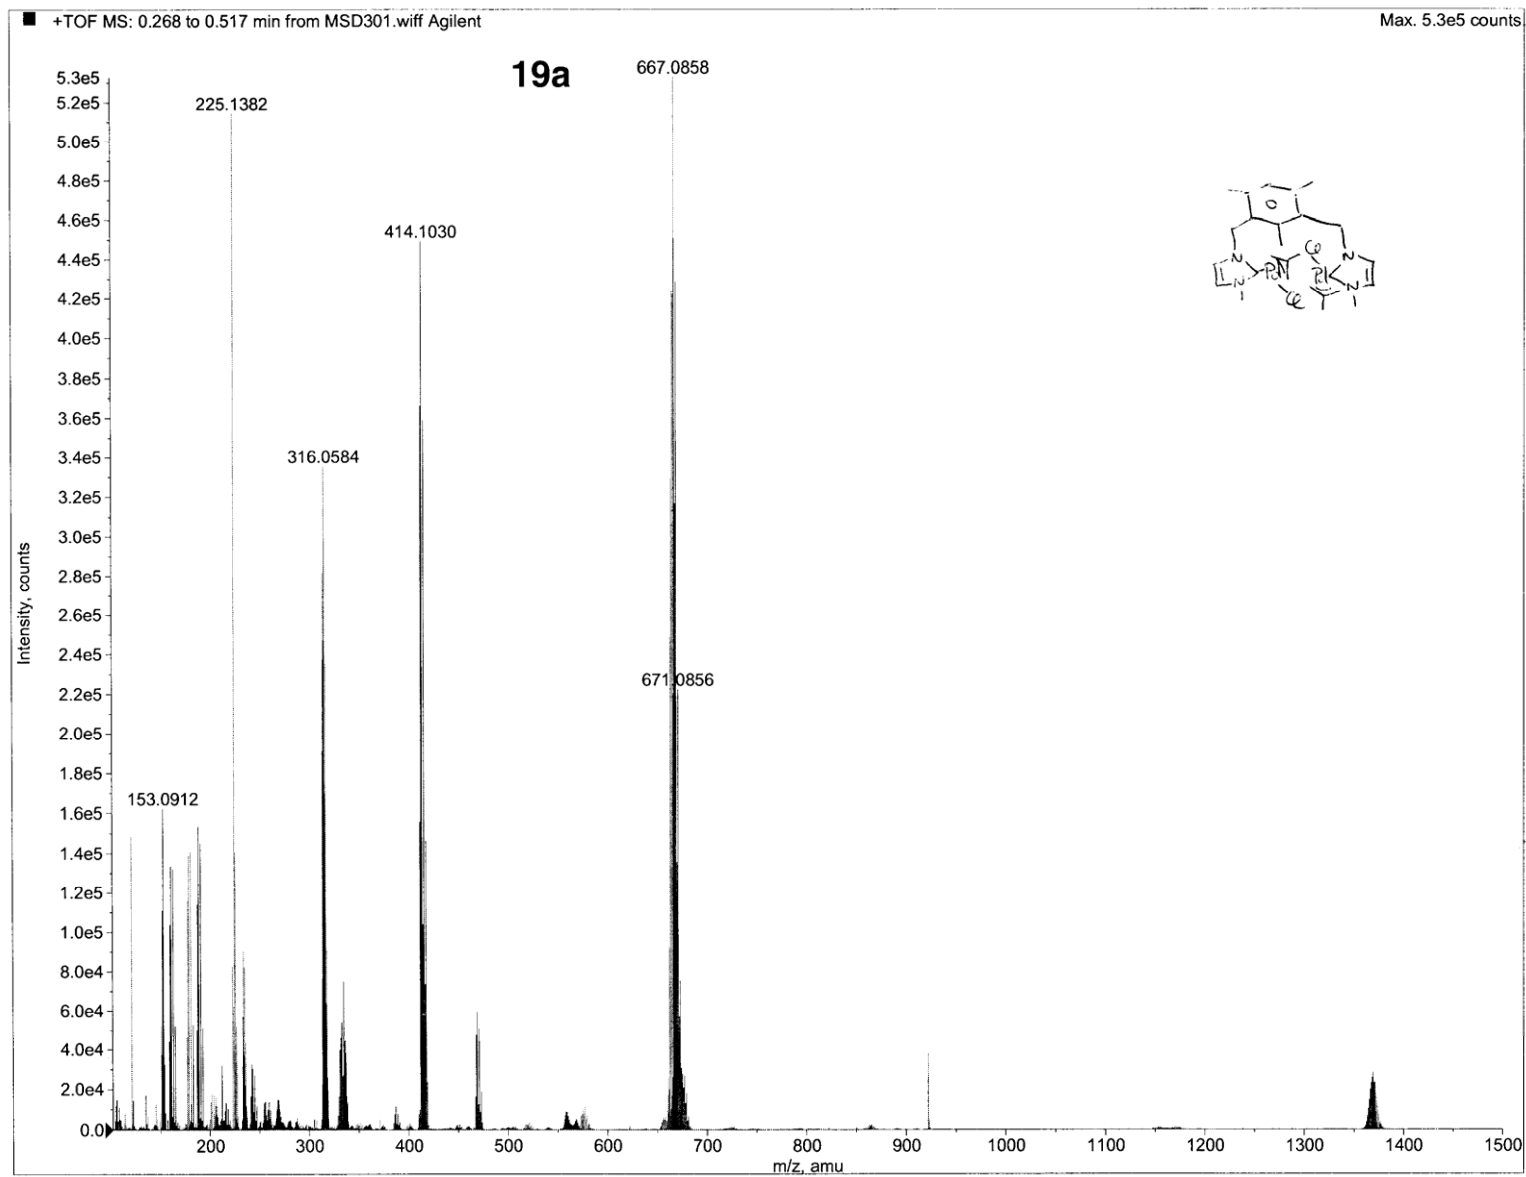

Fig S6. Mass spectrum of **19a**

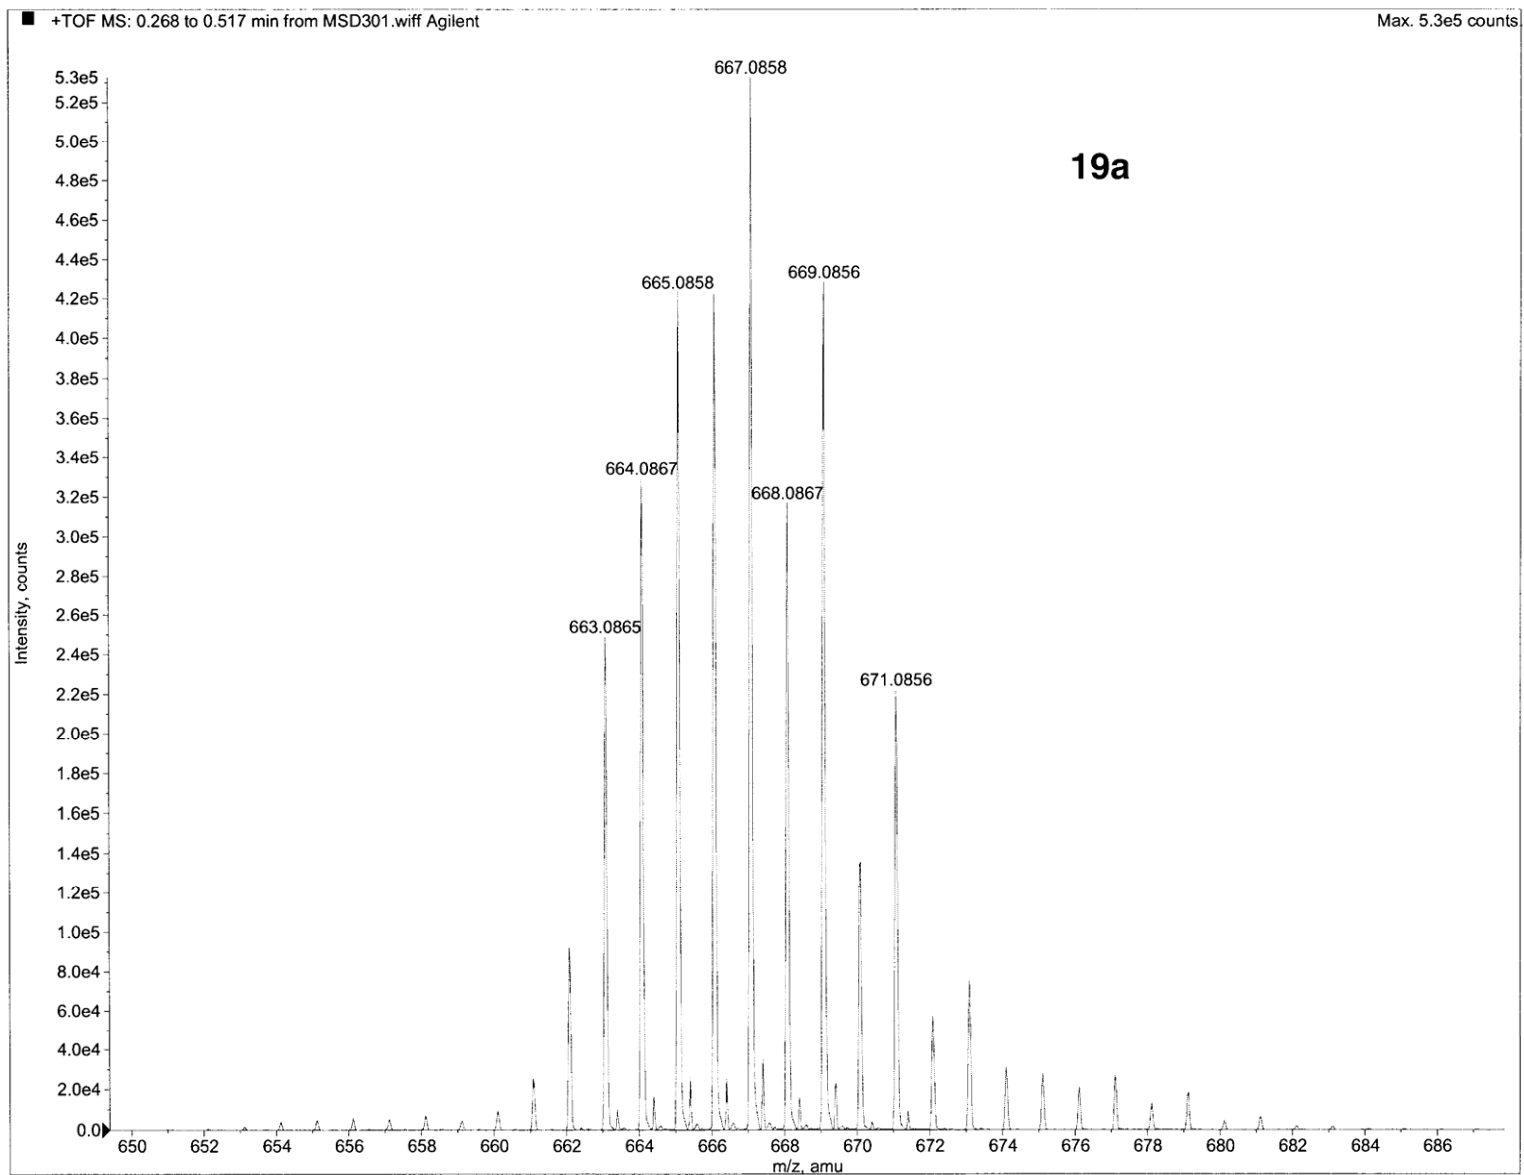

Fig S7. Mass spectrum of **19a**. Detail of  $[M-Cl]^+$



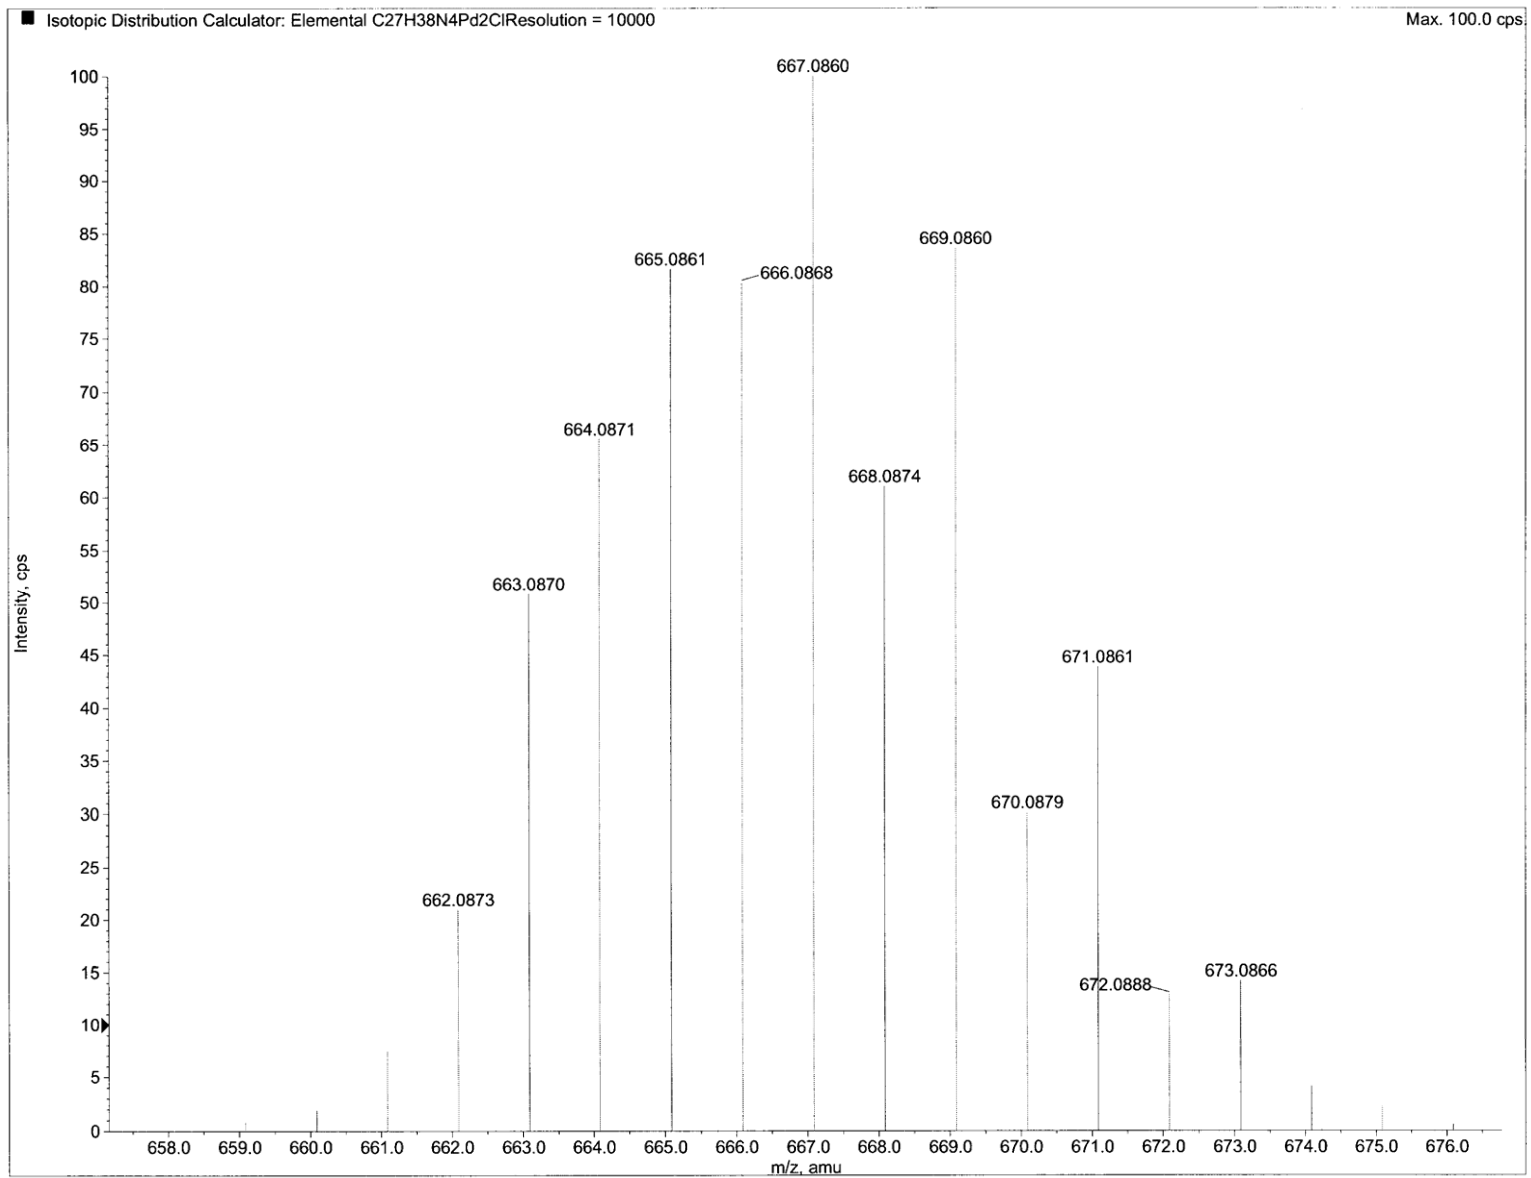

Fig S8. Mass spectrum of **19a**. Calculated  $[M-Cl]^+$

C<sub>27</sub>H<sub>38</sub>N<sub>4</sub>Pd<sub>2</sub>Cl

H1 / s2pu1 / Mercury-400-qui  
cdc13/Temp: 25C /N reg: M40006-041206160940  
Usuari: g12 / Mostra: c1m206  
Nom: ROSARIO AZNAR GARCIA  
Data: 04/12/06 / Sist automatic  
Pulse Sequence: s2pu1

19a

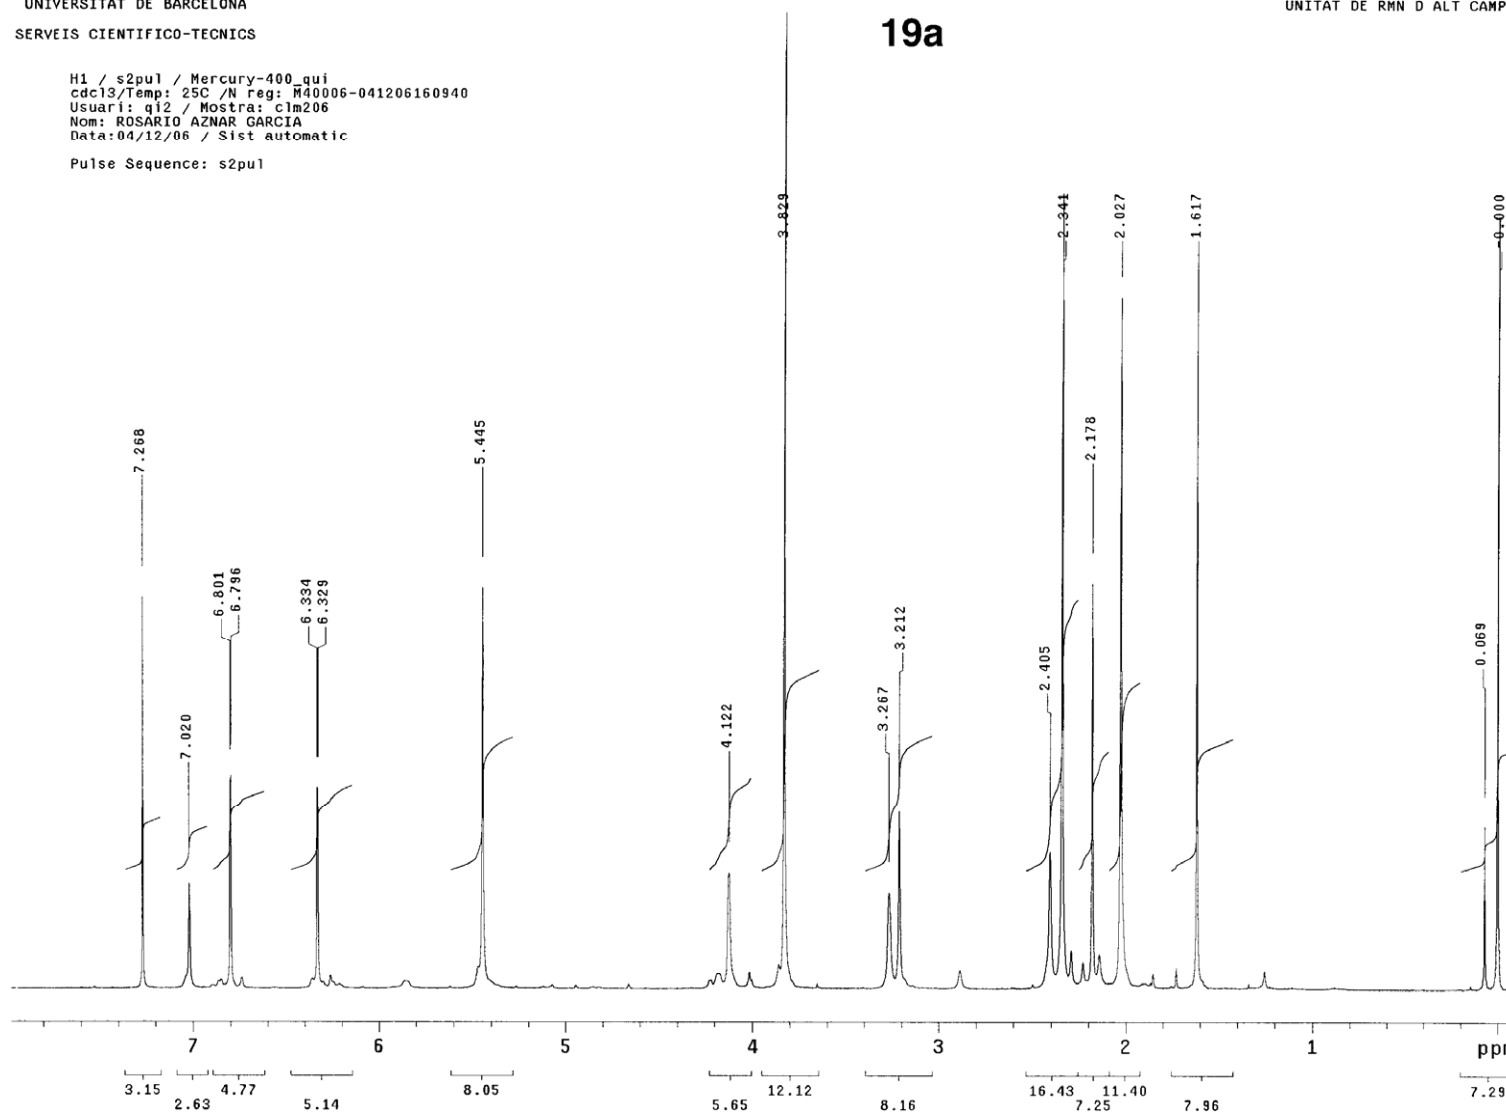

Fig S9. Proton NMR spectrum of **19a** in  $\text{CDCl}_3$  (400 MHz)

C13 / s2pu1 / Mercury-400\_gui  
cdcl3/Temp: 25C /N reg: M40006-051206181244  
Usuari: q12 / Mostra: c1m206concen  
Nom: FERNANDO FERNANDEZ ROMERO  
Data:06/12/06 / Sist automatic  
Pulse Sequence: s2pu1

19a

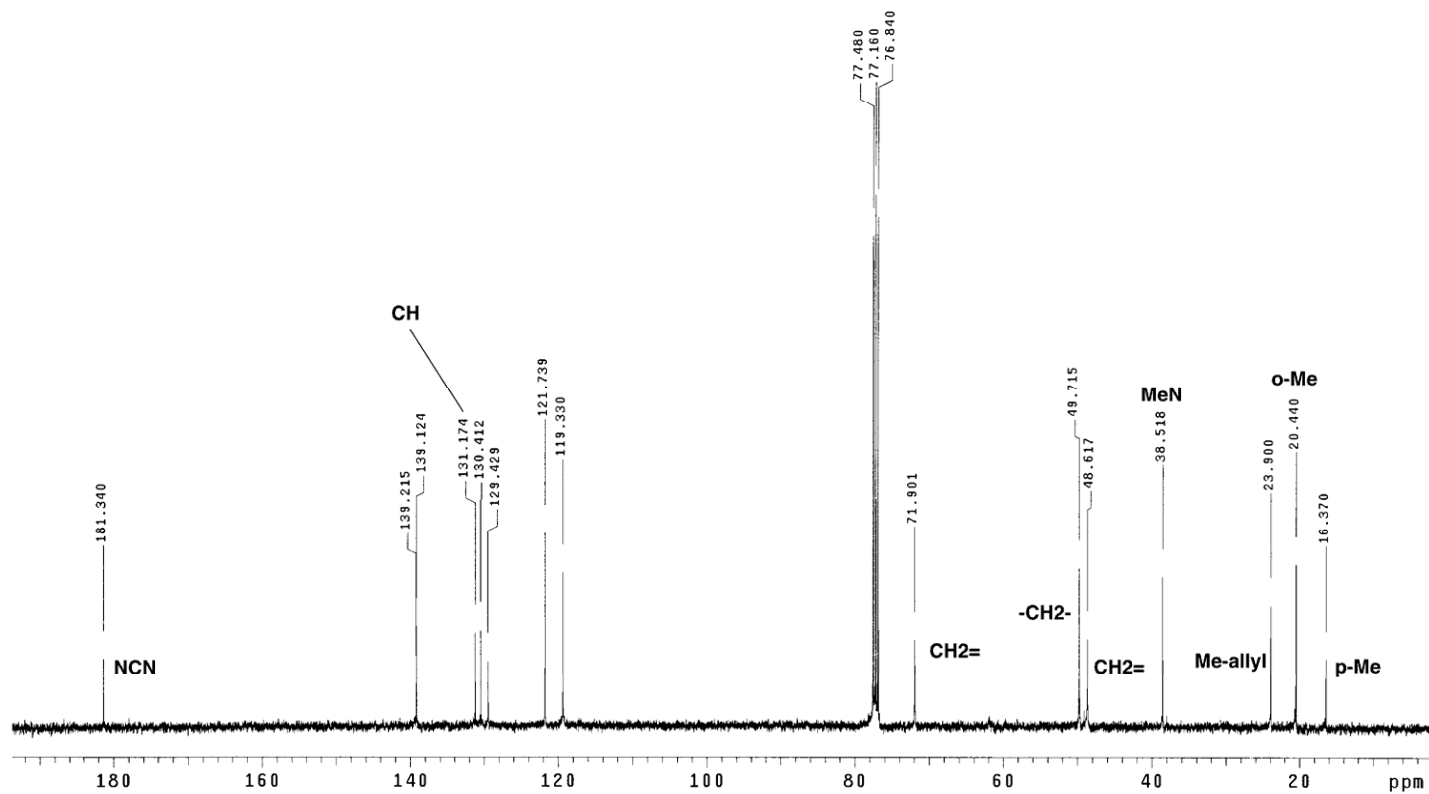

Fig S10.  $^{13}\text{C}\{^1\text{H}\}$  spectrum of **19a** in  $\text{CDCl}_3$

H1 / s2pu1 / Mercury-400 qui  
cdc13/Temp: 25C /N reg: M40007-160207162724  
Usuari: q12 / Mostra: c1m564  
Nom: CRISTINA LOPEZ MOSQUERA  
Data:16/02/07 / Sist automatic  
Pulse Sequence: s2pu1

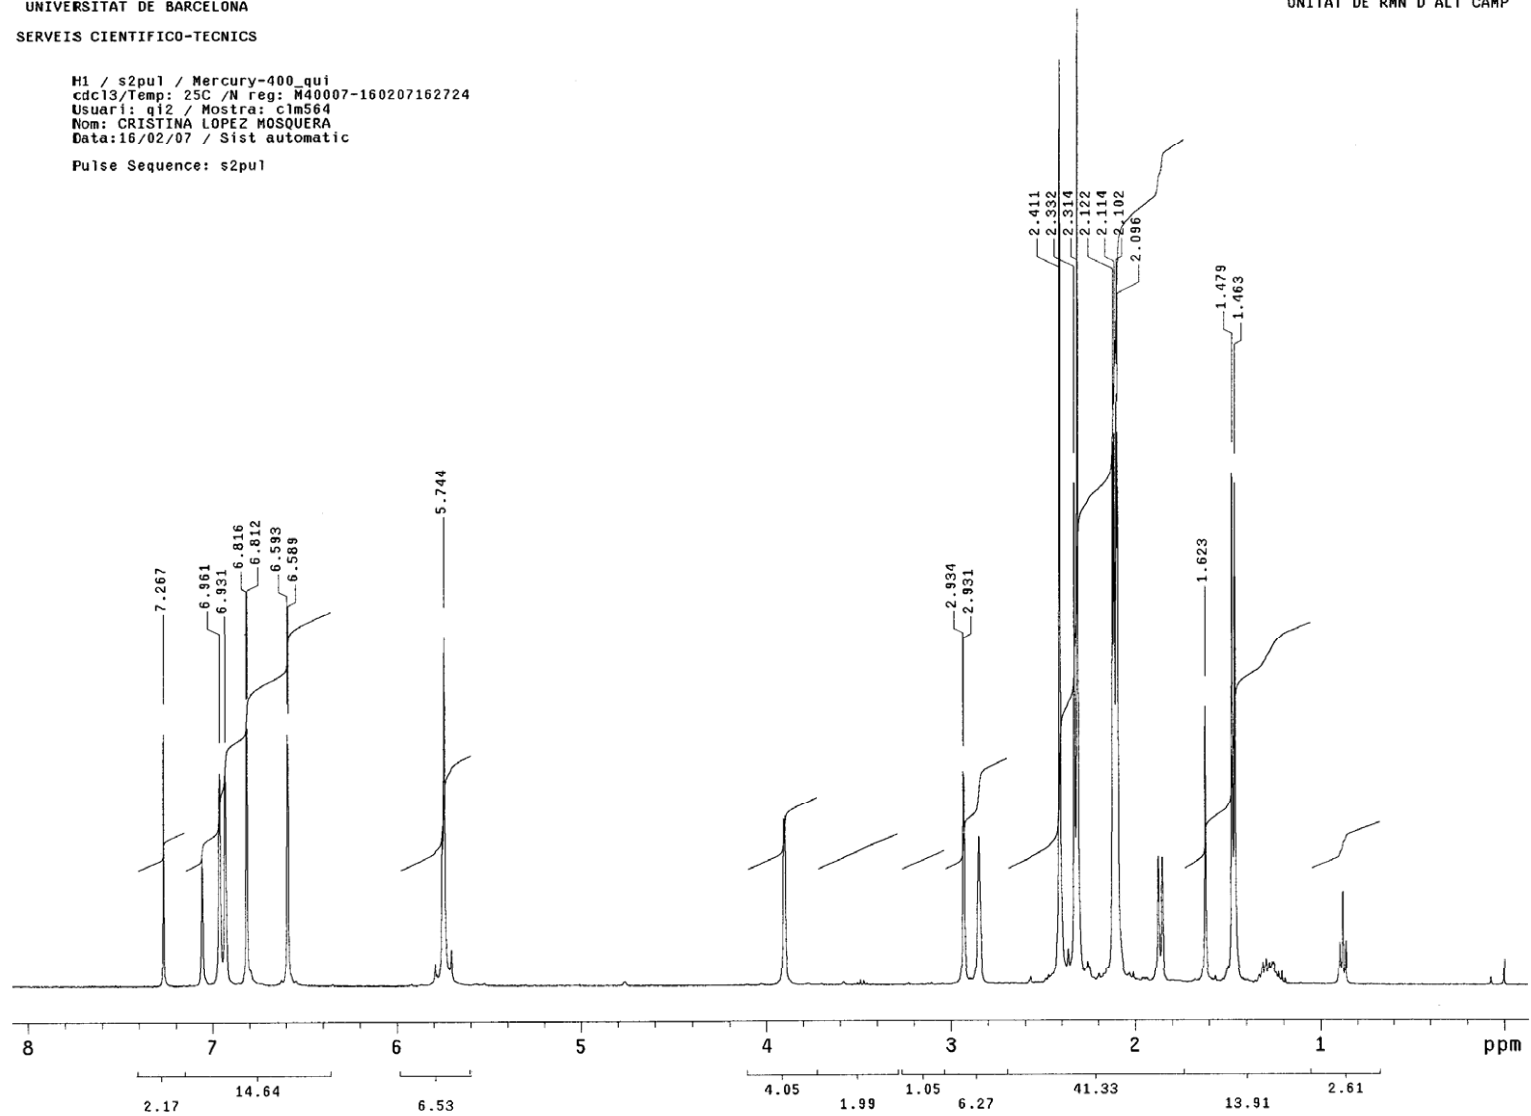

Fig S11. Proton NMR spectrum of **19b** in CDCl<sub>3</sub> (400 MHz)

C13 / s2pu1 / Mercury-400\_gui  
cdcl3/Temp: 25C /N req: M40007-160207162724  
Usuari: q12 / Mostra: c1m564  
Nom: CRISTINA LOPEZ MOSQUERA  
Data:16/02/07 / Sist automatic  
Pulse Sequence: s2pu1

**19b**

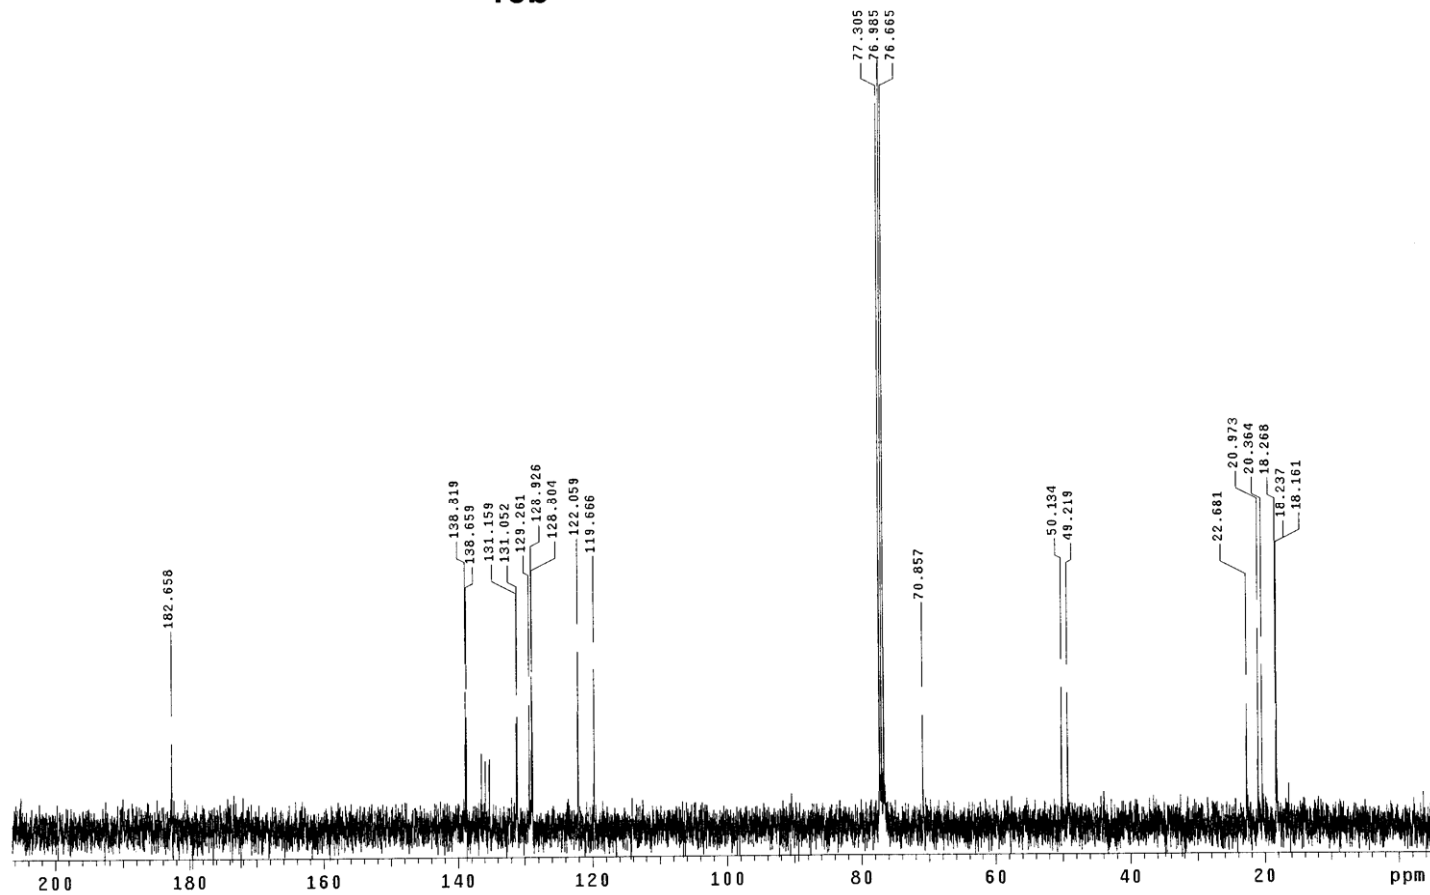

Fig S12.  $^{13}\text{C}\{^1\text{H}\}$  spectrum of **19b** in  $\text{CDCl}_3$

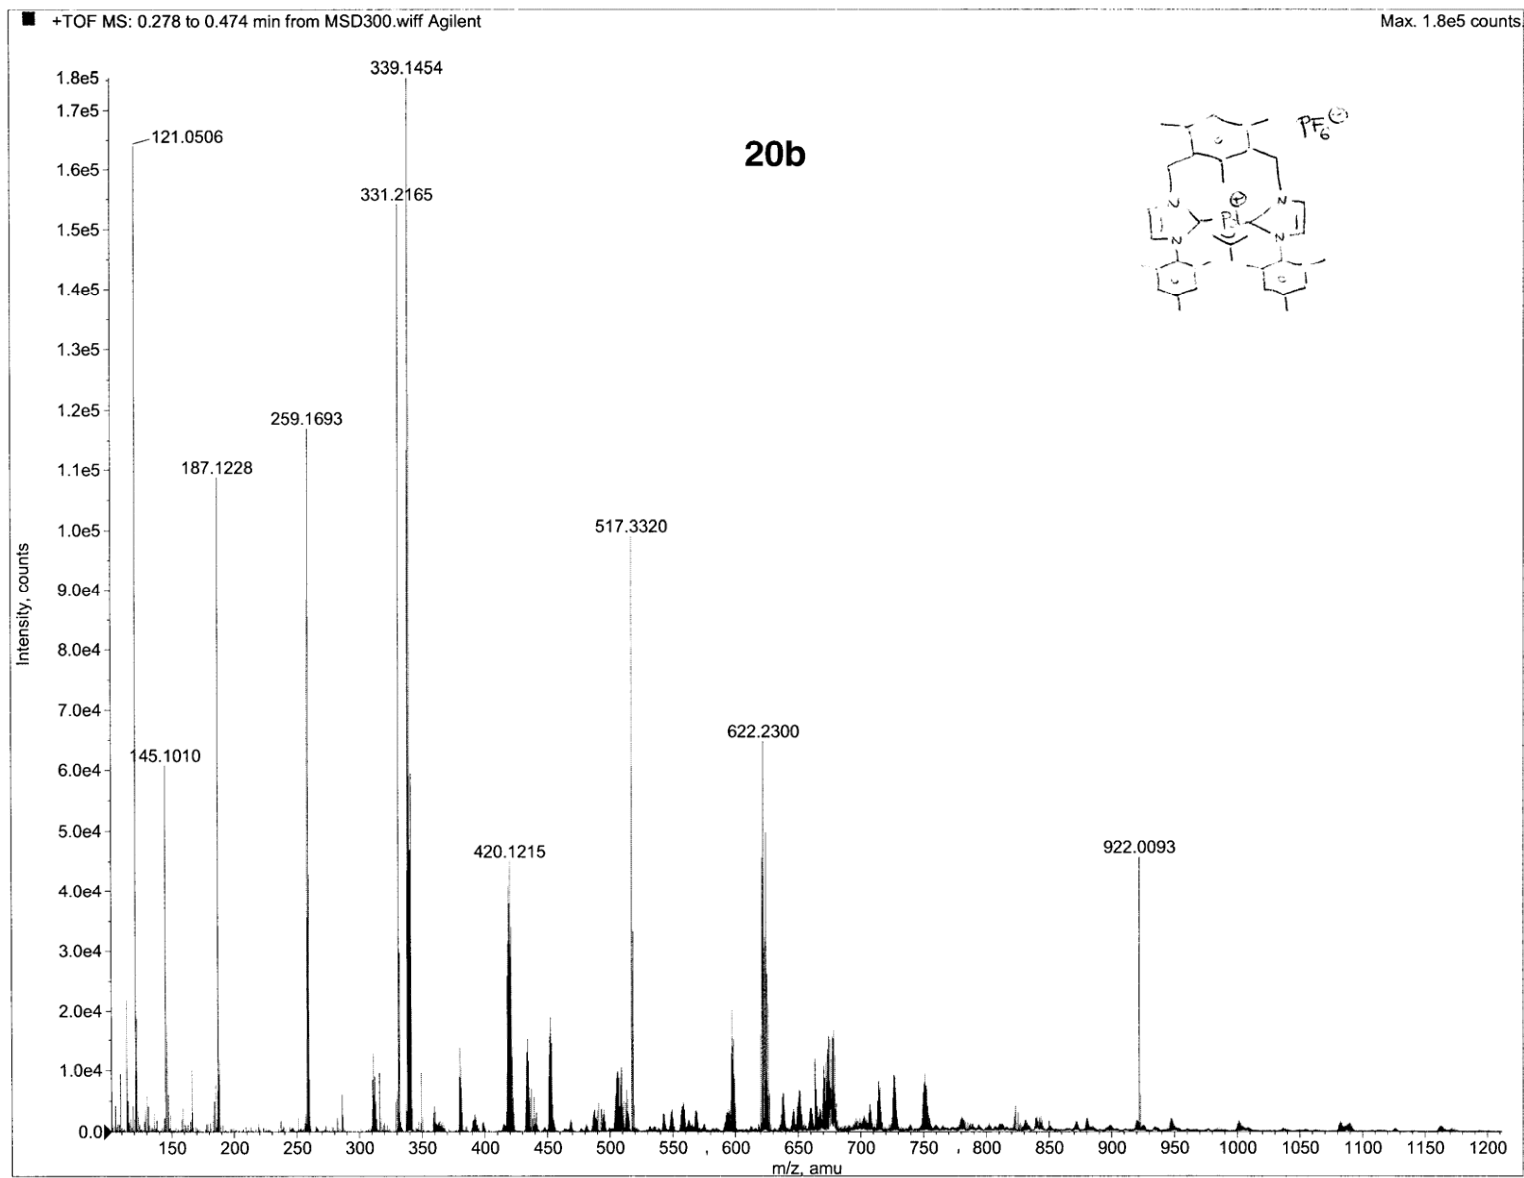

Fig S13. Mass spectrum of **20b**

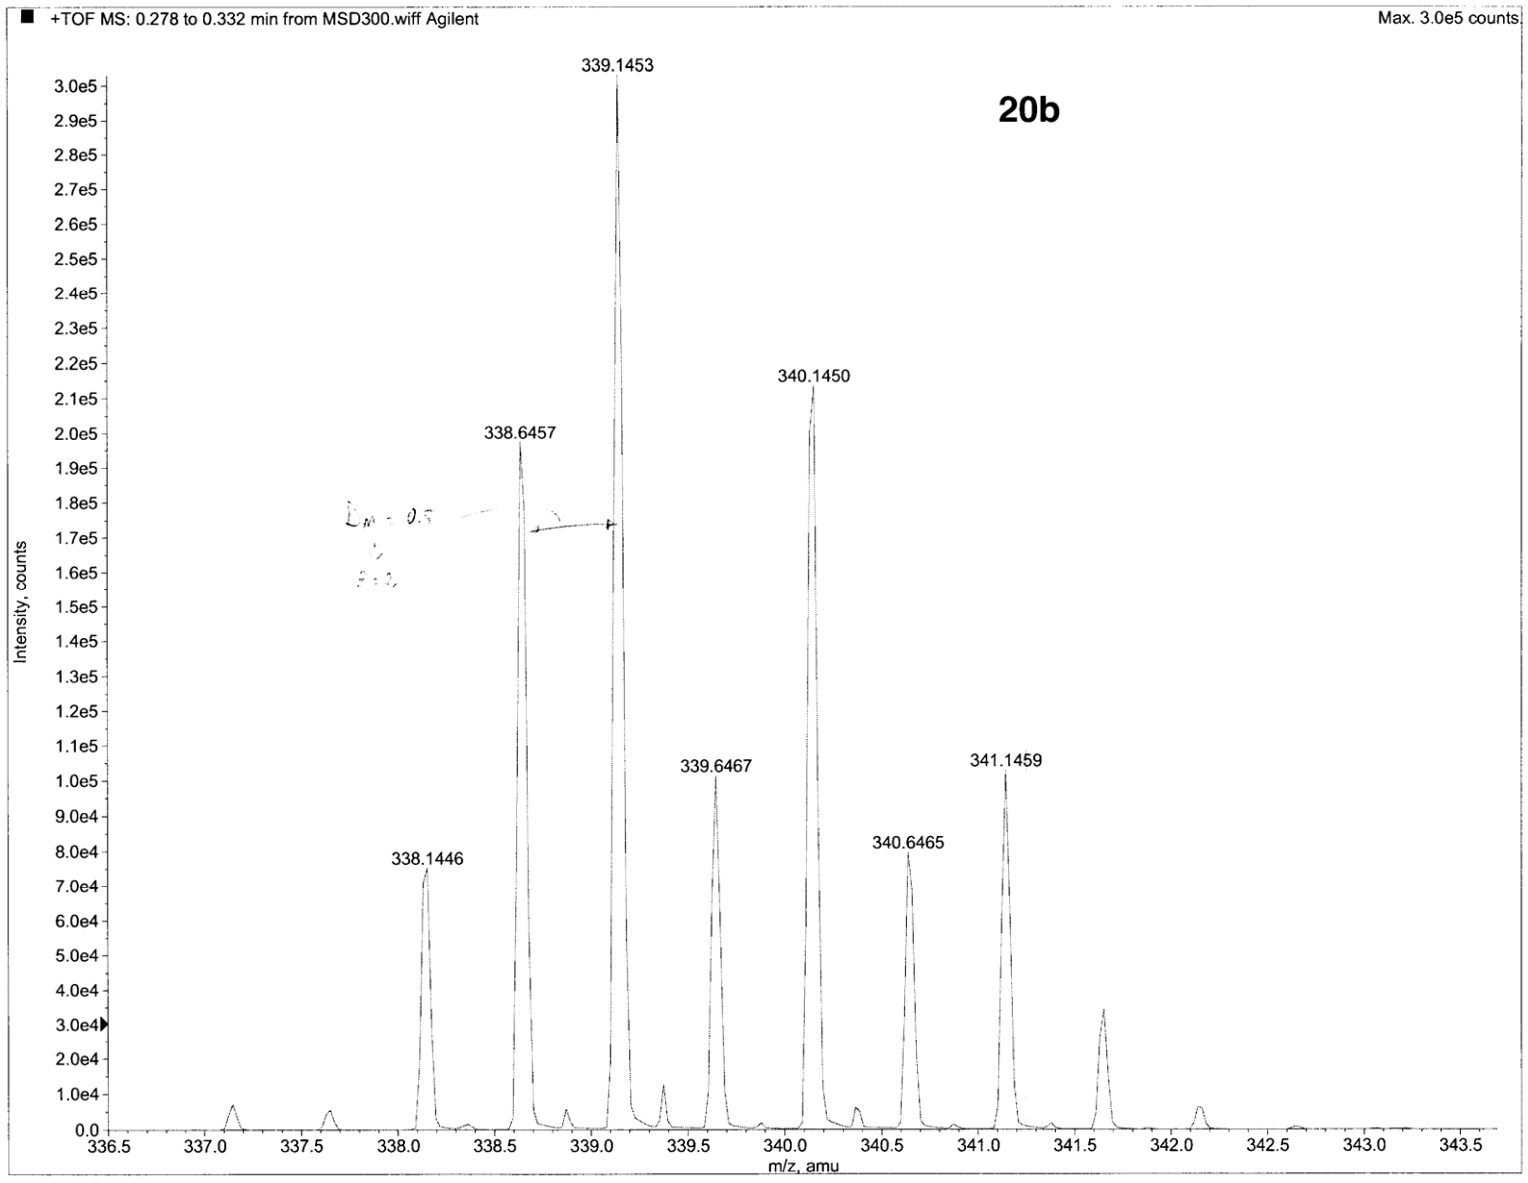

Fig S14. Mass spectrum of **20b**. Detail of  $[M+H]^{2+}$

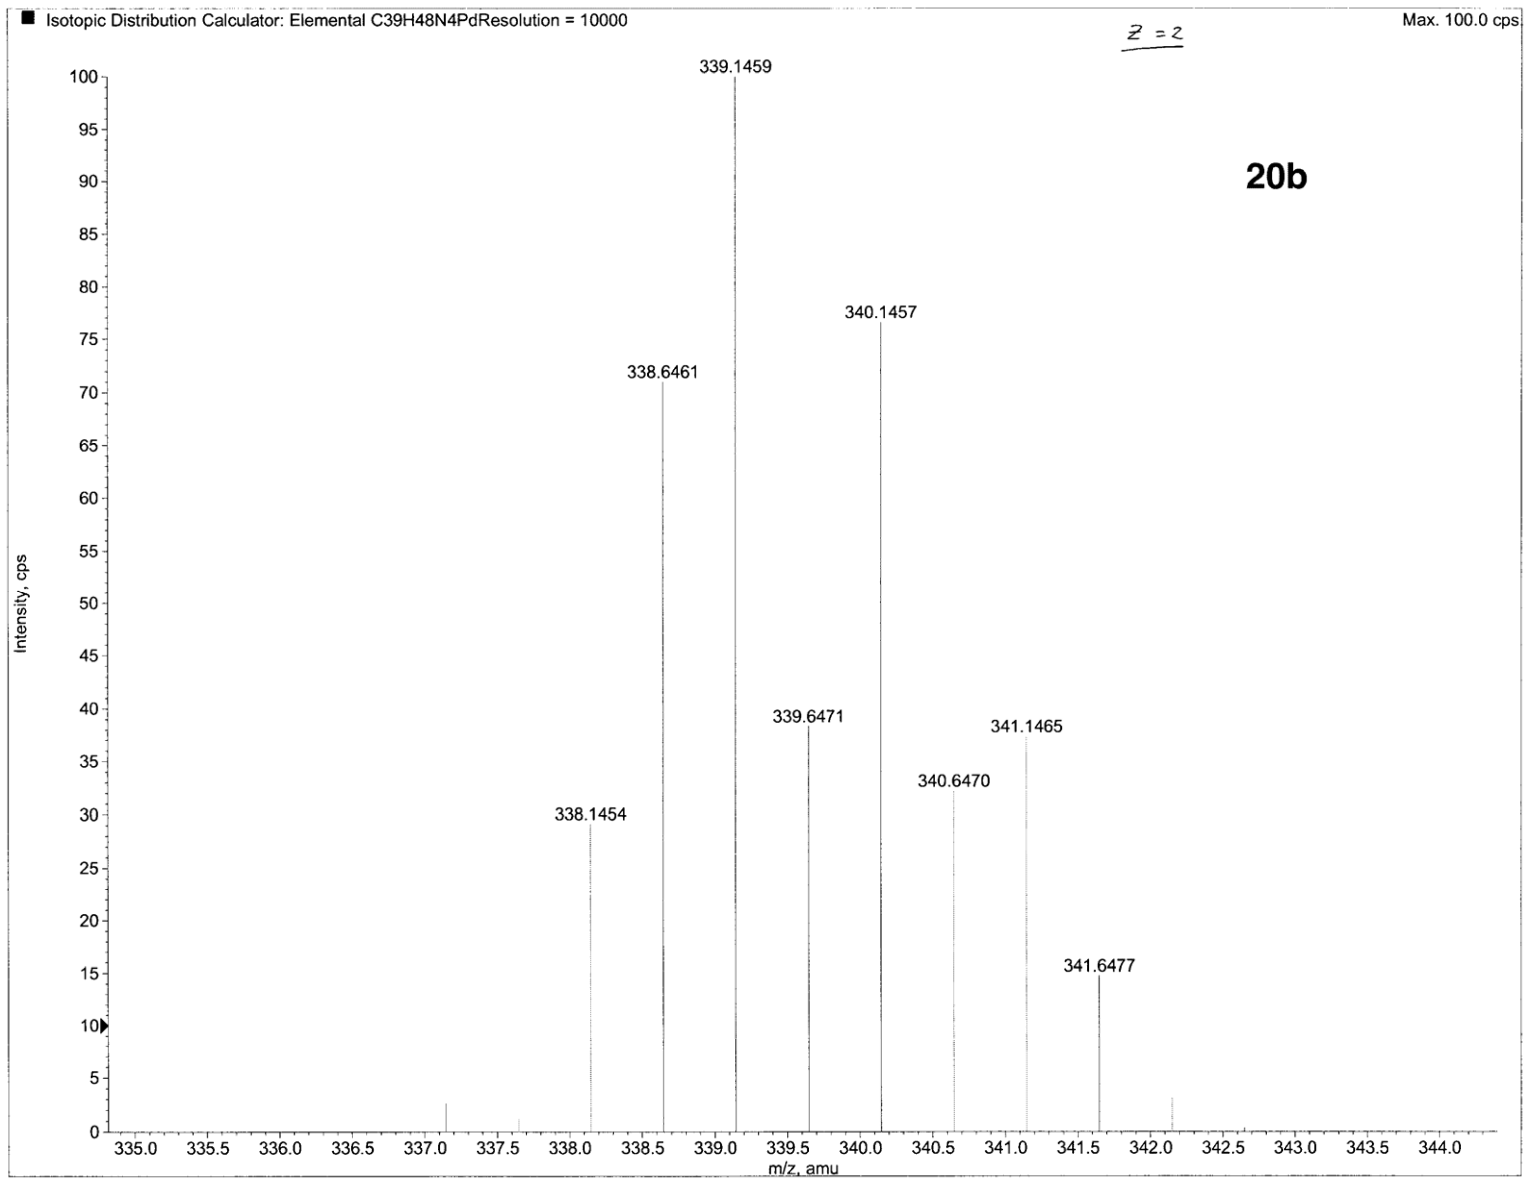

Fig S15. Mass spectrum of **20b**. Pattern of  $[M+H]^{2+}$

C<sub>39</sub>H<sub>48</sub>N<sub>4</sub>Pd



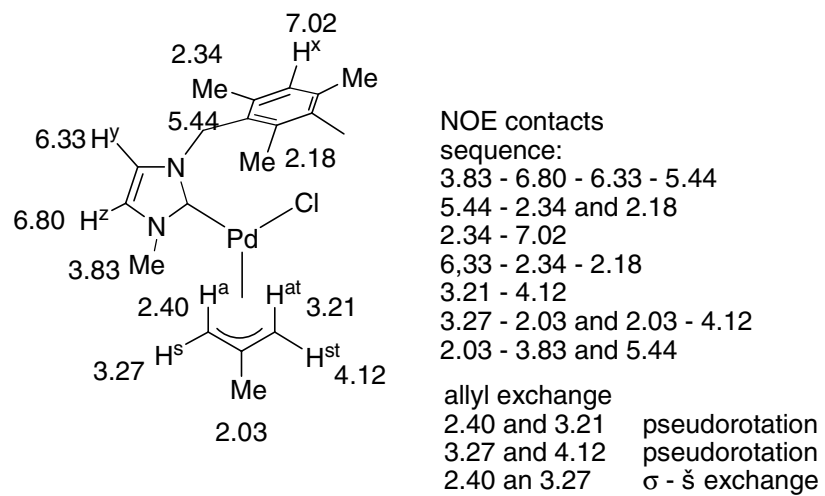

Fig S16. Full assignment of the Proton spectrum of **19a**
